# Supplementary material for: Comparative Analysis of Indocyanine Green and Methylene Blue for Sentinel Lymph Node Mapping in V-NOTES Staging Surgery for Endometrial Cancer
Source: Research Square preprint supplement (doi:10.21203/rs.3.rs-6714514/v1), 2025-06-10
Supplement: Supplementary file 1 [file 043de610424a6b3655861d7d.docx]

**Comparative Analysis of Indocyanine Green and Methylene Blue for Sentinel Lymph Node Mapping in V-NOTES Staging Surgery for Endometrial Cancer**

Kevser ARKAN ¹, Ali Deniz ERKMEN ¹, Mesut Ali HALISCELIK¹, Seyhmus TUNC², Gul CAVUSOGLU COLAK², Sedat AKGOL¹, Behzat CAN¹

**Highlights**

- ICG provided a significantly higher SLN detection rate for endometrial cancer staging with V-NOTES (95% vs. 82.5%).
- The mean number of SLNs detected in the ICG group (3.2 ± 1.1) was significantly higher than in the methylene blue group (2.5 ± 0.9).
- The detection rate of bilateral SLNs was higher with ICG but not statistically significant (p=0.112).
- The real-time imaging advantage of ICG suggests that it is a promising SLN marker in minimally invasive approaches.
- The number of positive SLNs was similar in both groups, suggesting that both agents may have similar accuracy in detecting metastases.
